# Supplementary material
Source: PubMed Central journal article supplement (PMC4561717)
Supplement: AEM.01549-15_zam999116577so1.pdf [file AEM.01549-15_zam999116577so1.pdf]

1. The *cre* targets that were collected by Fujita in *B. subtilis* (1) to predict the *cre*-like sequences in the promoters of genes of *Bacillus thuringiensis* HD-789.

|       |                |               |
|-------|----------------|---------------|
| >amyE | TGTAAGCGTTAACA | Score : 12.97 |
| >bglP | TGAAAGCGTTGACA | Score : 13.05 |
| >cccA | TGTAAGCGTATACA | Score : 11.71 |
| >citM | TGTAAGCGGATTCA | Score : 10.94 |
| >ydbH | TGAAAACGCTATCA | Score : 13.28 |
| >glpF | TGACACCGCTTTCA | Score : 11.57 |
| >mala | TGTAAACGTTATCA | Score : 12.20 |
| >gntR | TGAAAGTGTTTGCA | Score : 10.08 |
| >kduI | TGAAACCGTTACCA | Score : 10.90 |
| >phoP | TGAAAGCGCTATCA | Score : 14.62 |
| >acoR | TGAAAGCGCTTTAT | Score : 11.85 |
| >acuA | TGAAAACGCTTTAT | Score : 10.51 |
| >mmgA | TGTAAGCGCTGTCT | Score : 12.67 |
| >msmX | AGAAAGCGTTTACA | Score : 11.57 |
| >xsa  | TAAAAGCGCTTACA | Score : 11.69 |
| >yxjC | TGTAAACGCTTTCT | Score : 12.31 |

2. The *dre* sequences of *nagA*, *nagP* and *chiB* in *Bacillus thuringiensis* HD-789 to predict the *dre*-like sequences in the promoters of genes of *Bacillus thuringiensis* HD-789

|       |                  |               |
|-------|------------------|---------------|
| >nagA | GCACGAGTAGTTGTCT | Score : 11.72 |
| >nagP | ACACATCTATACAAC  | Score : 10.89 |
| >chiB | AGACTTCGTGATGTCT | Score : 12.03 |

1. **Fujita Y.** 2009. Carbon catabolite control of the metabolic network in *Bacillus subtilis*. *Biosci Biotechnol Biochem* **73**:245-259.
